# Supplementary material for: Ligand-free Suzuki–Miyaura coupling using ruthenium(0) nanoparticles and a continuously irradiating microwave system
Source: Royal Society of Chemistry journal article supplement (doi:10.1039/c7gc01166k), 2017-01-01
Supplement: c7gc01166k2.pdf [file c7gc01166k2.pdf]

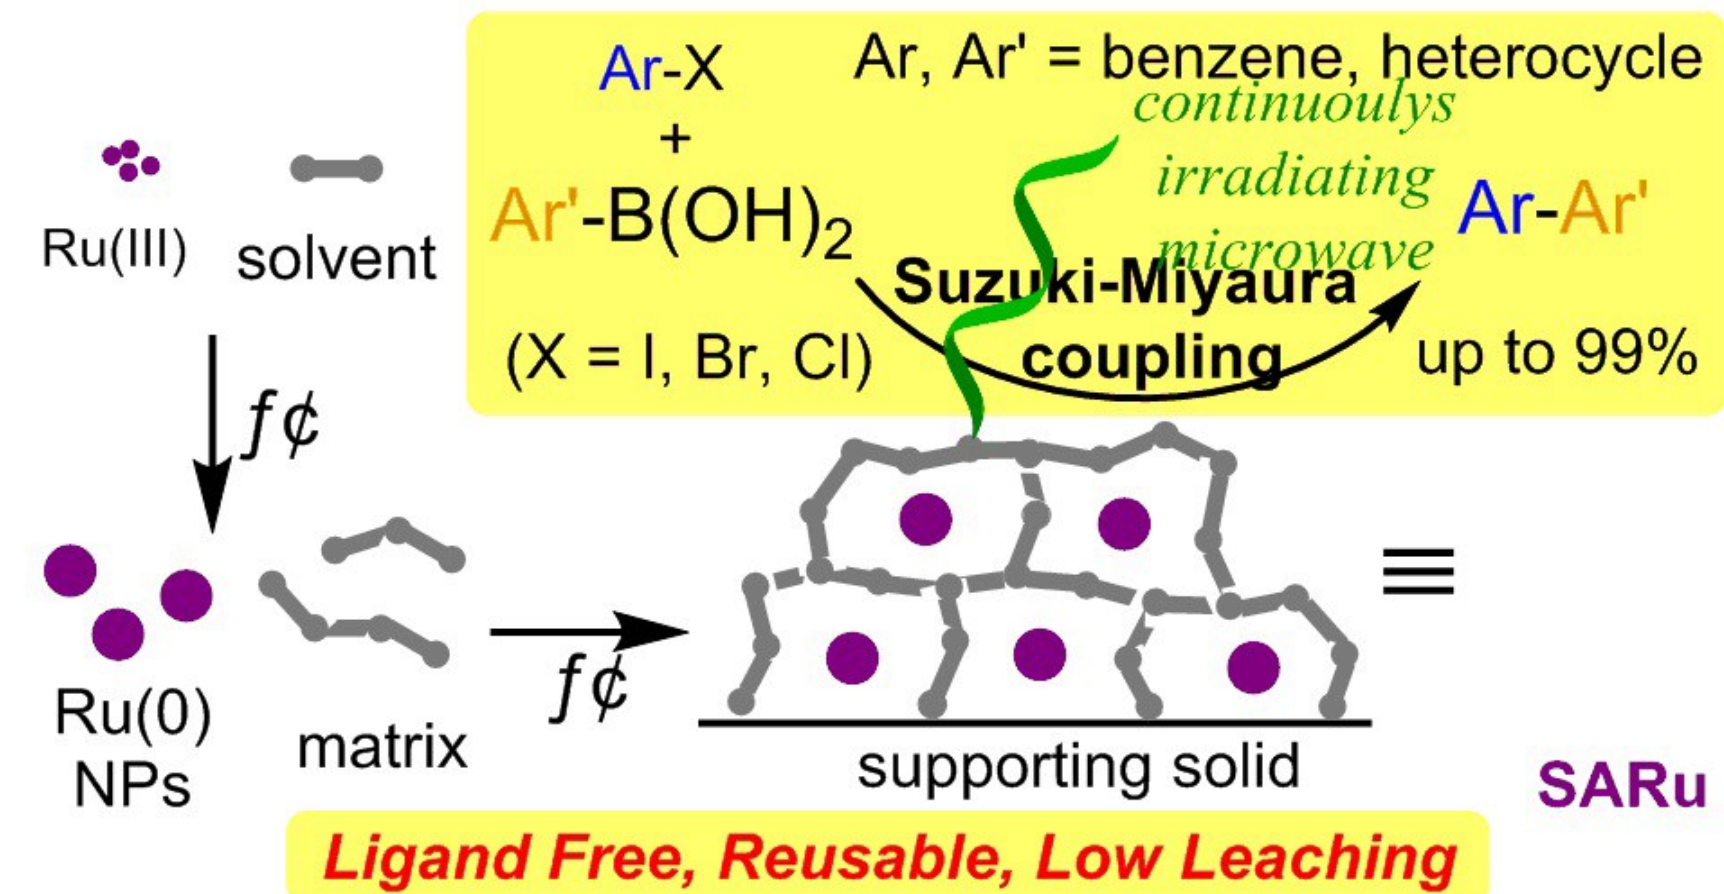

**A good combination between a continuously irradiating microwave system and recyclable Ru(0) for ligand-free Suzuki–Miyaura coupling**
